# Supplementary material
Source: PubMed Central journal article supplement (PMC2040432)

**A**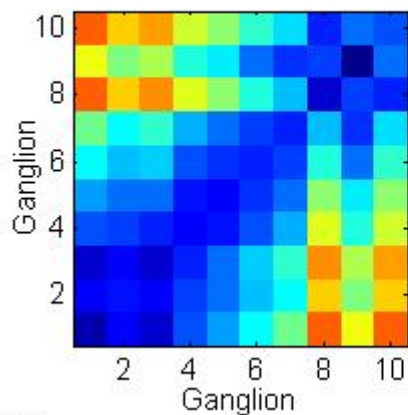**B**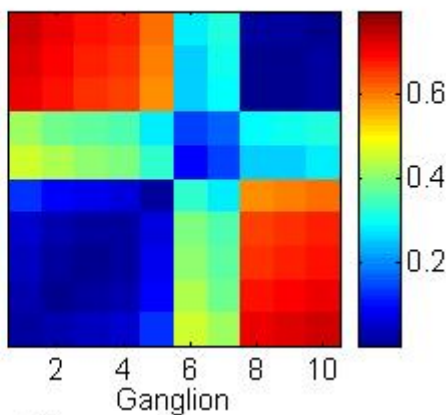**C**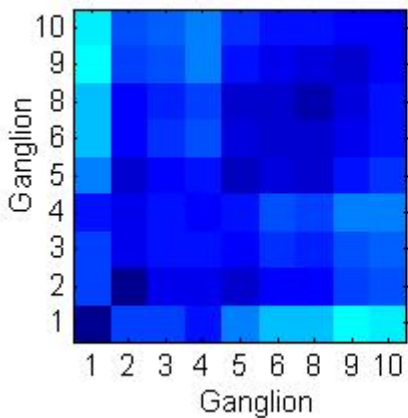**D**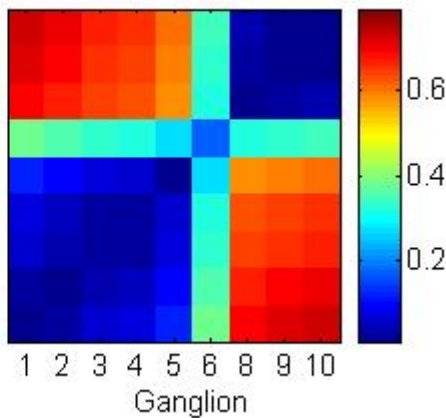

Supplement: pnas_0703183104_1.pdf [file pnas_0703183104_1.pdf]

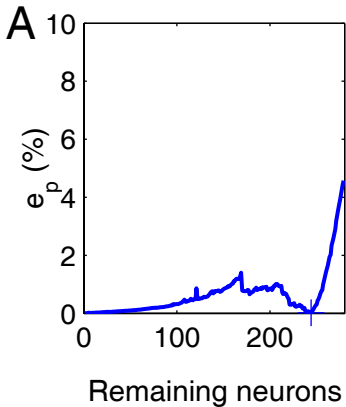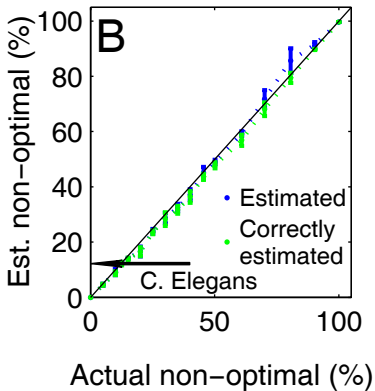

Supplement: pnas_0703183104_2.pdf [file pnas_0703183104_2.pdf]

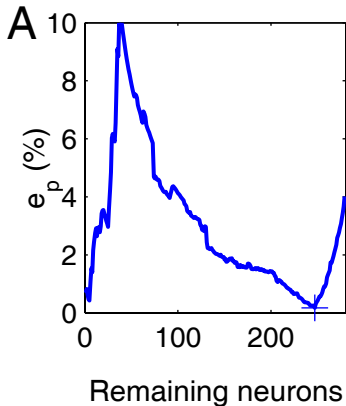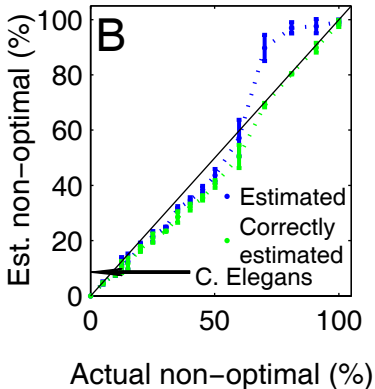

Supplement: pnas_0703183104_3.pdf [file pnas_0703183104_3.pdf]

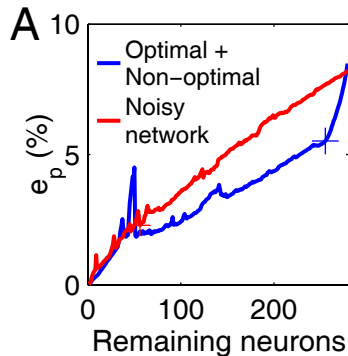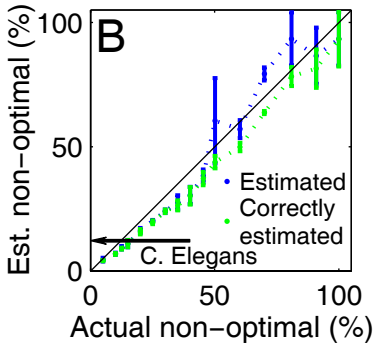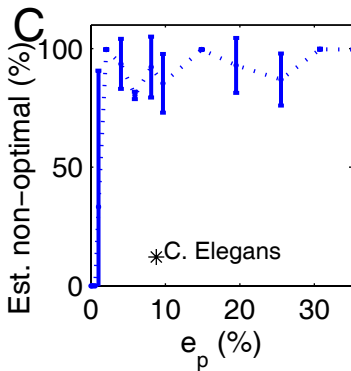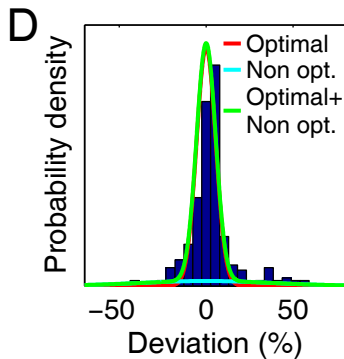

Supplement: pnas_0703183104_4.pdf [file pnas_0703183104_4.pdf]

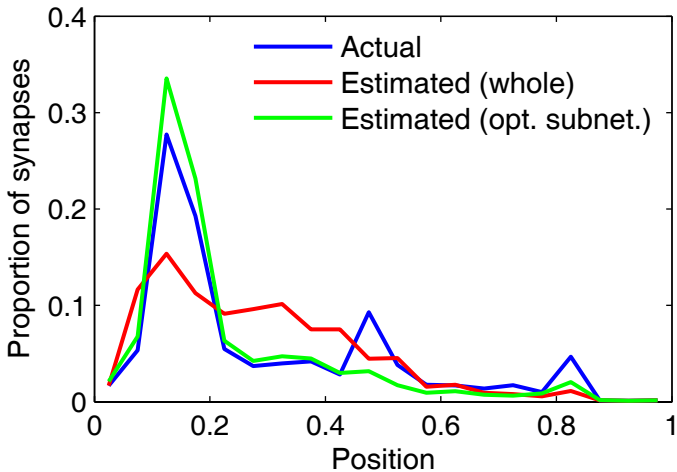

Supplement: pnas_0703183104_6.pdf [file pnas_0703183104_6.pdf]

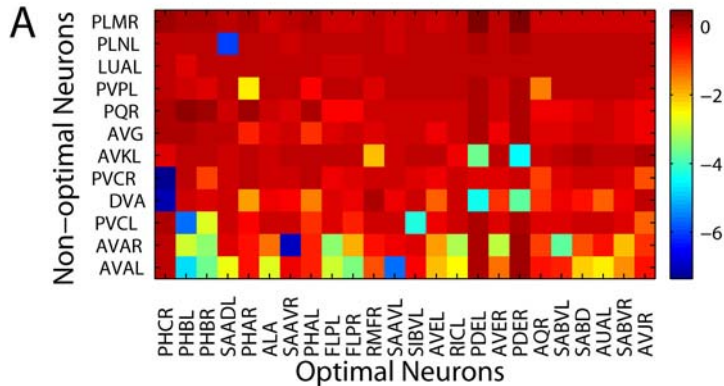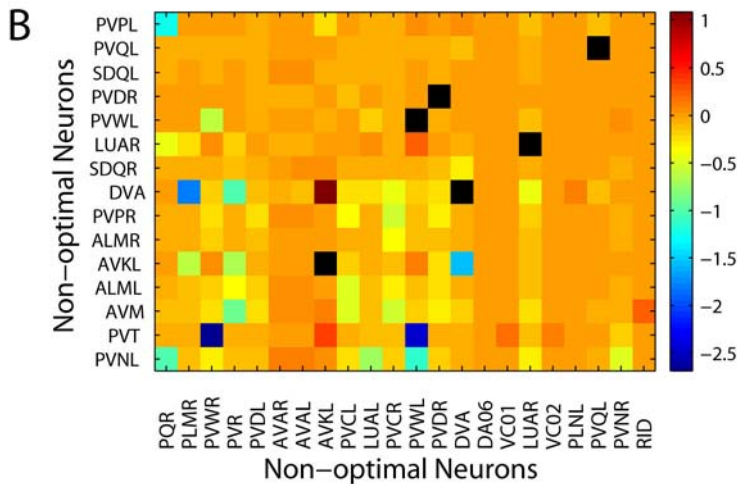

Supplement: pnas_0703183104_7.pdf [file pnas_0703183104_7.pdf]

Non-optimal Neurons

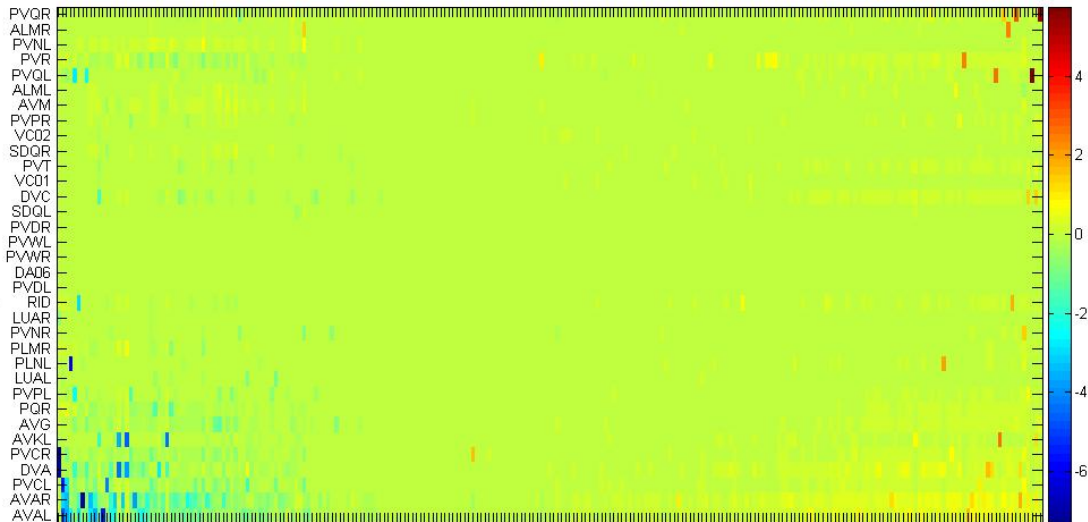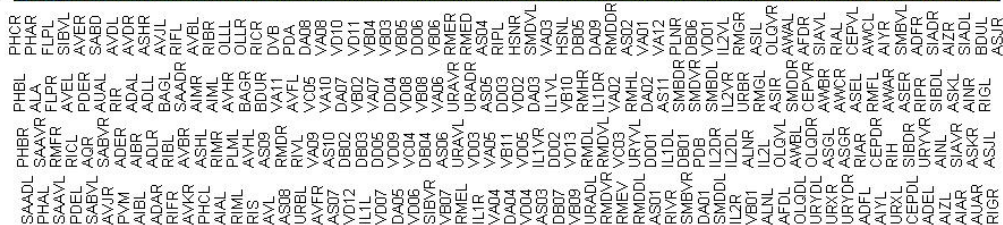

Optimal Neurons

Supplement: pnas_0703183104_8.pdf [file pnas_0703183104_8.pdf]

Non-optimal Neurons

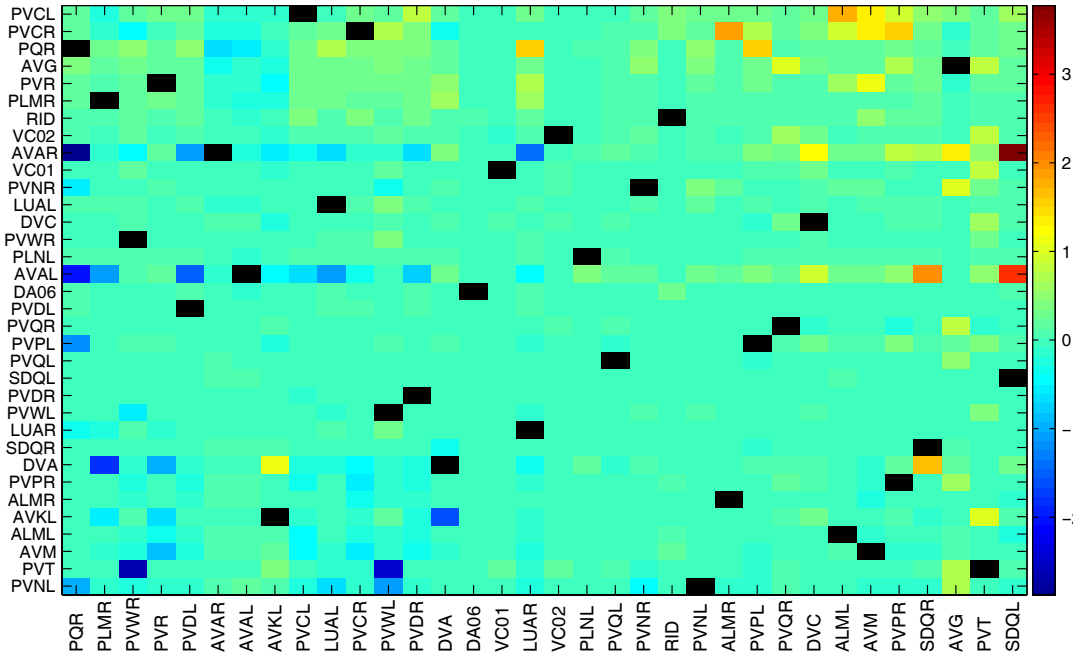

Non-optimal Neurons

Supplement: pnas_0703183104_9.pdf [file pnas_0703183104_9.pdf]
